# Supplementary material
Source: MDPI journal article supplement (https://www.mdpi.com/2072-4292/16/10/1786)
Supplement: s1 [file s1]

Figure S1. Example of different distribution shapes of HANTS variable between landcover types

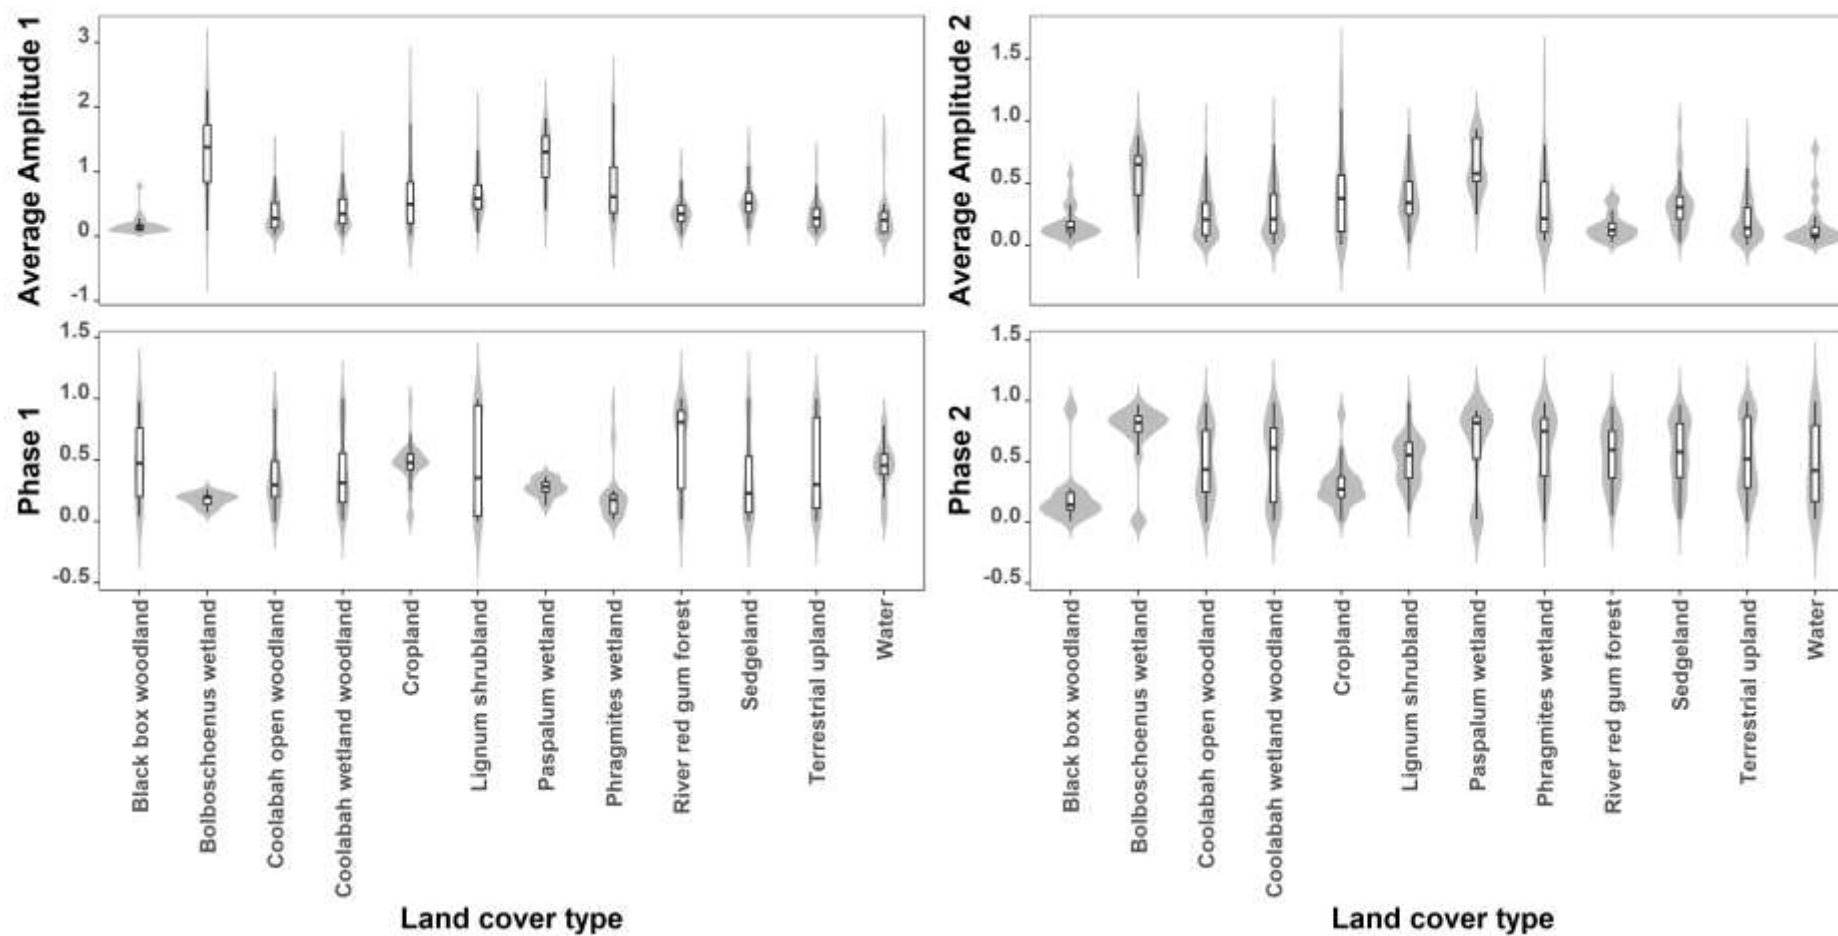

**Table S1. Testing Confusion Matrix****Level 1 model**

|             | Cropland | Terrestrial | Water | Wetland |
|-------------|----------|-------------|-------|---------|
| Cropland    | 15       | 0           | 0     | 4       |
| Terrestrial | 0        | 22          | 0     | 10      |
| Water       | 0        | 0           | 5     | 2       |
| Wetland     | 4        | 4           | 0     | 127     |

**L2 model**

|             | Cropland | Forest | Marsh | Sedgeland | Shrubland | Terrestrial | Water | Woodland |
|-------------|----------|--------|-------|-----------|-----------|-------------|-------|----------|
| Cropland    | 18       | 0      | 0     | 0         | 0         | 1           | 0     | 1        |
| Forest      | 0        | 13     | 0     | 0         | 2         | 0           | 0     | 0        |
| Marsh       | 0        | 0      | 16    | 3         | 0         | 0           | 0     | 0        |
| Sedgeland   | 1        | 1      | 0     | 11        | 1         | 0           | 0     | 2        |
| Shrubland   | 0        | 1      | 0     | 0         | 18        | 0           | 0     | 4        |
| Terrestrial | 0        | 1      | 0     | 0         | 0         | 19          | 0     | 6        |
| Water       | 0        | 0      | 1     | 1         | 1         | 0           | 5     | 0        |
| Woodland    | 0        | 1      | 0     | 3         | 1         | 6           | 0     | 54       |

**L3 model**

|      | VC1 | VC2 | VC3 | VC4 | VC5 | VC6 | VC7 | VC8 | VC9 | VC10 | VC11 | VC12 |
|------|-----|-----|-----|-----|-----|-----|-----|-----|-----|------|------|------|
| VC1  | 7   | 0   | 1   | 0   | 0   | 0   | 0   | 0   | 0   | 0    | 0    | 0    |
| VC2  | 0   | 12  | 4   | 0   | 0   | 0   | 0   | 1   | 2   | 2    | 0    | 0    |
| VC3  | 0   | 4   | 19  | 0   | 0   | 1   | 0   | 1   | 1   | 1    | 0    | 0    |
| VC4  | 0   | 1   | 2   | 19  | 0   | 0   | 0   | 0   | 4   | 0    | 0    | 0    |
| VC5  | 0   | 0   | 0   | 0   | 5   | 0   | 3   | 0   | 3   | 0    | 0    | 0    |
| VC6  | 0   | 4   | 1   | 0   | 1   | 16  | 0   | 2   | 1   | 3    | 1    | 0    |
| VC7  | 0   | 0   | 0   | 0   | 0   | 0   | 1   | 0   | 0   | 0    | 0    | 0    |
| VC8  | 0   | 0   | 0   | 0   | 0   | 2   | 0   | 11  | 0   | 0    | 0    | 0    |
| VC9  | 0   | 2   | 2   | 0   | 1   | 2   | 0   | 0   | 7   | 0    | 0    | 0    |
| VC10 | 0   | 4   | 2   | 0   | 0   | 1   | 0   | 2   | 0   | 20   | 0    | 0    |
| VC11 | 0   | 1   | 0   | 0   | 0   | 1   | 0   | 0   | 0   | 0    | 4    | 0    |
| VC12 | 0   | 0   | 0   | 0   | 0   | 0   | 0   | 0   | 0   | 0    | 0    | 6    |

VC1=Black box woodland; VC2=Coolabah wetland woodland; VC3=Coolabah open woodland; VC4=Cropland;  
VC5=*Phragmites* wetland; VC6=*Lignum* shrubland; VC7=*Bolboschoenus* wetland; VC8=River red gum forest;  
VC9=Sedgeland; VC10=Terrestrial; VC11=Water; VC12=*Paspalum* wetland.
